# Supplementary material for: Structure-guided design of a novel, stable, and soluble Cecropin A variant for antimicrobial therapeutic applications
Source: Research Square preprint supplement (doi:10.21203/rs.3.rs-6996527/v1), 2025-07-21
Supplement: Supplementary file 1 [file f1df496be7eeb1c8704f679d.docx]

|  | | | |
| --- | --- | --- | --- |
| Table S1.  Validation results of modeled and refined structures by AlphaFold and Robetta, server: | | | |
| Structural Evaluation of AlphaFold Models: | | | |
| Model/Server Ramachandran plot ERRAT score Z-score | | | |
| Model 1-A | Favored region 64(98.5%)  Allowed region 1(1.5%)  Outlier region 0(0%) | 95.52 | -1.72 |
| Model 2-A | Favored region 64(98.5%)  Allowed region 1(1.5%)  Outlier region 0(0%) | 94.02 | -1.77 |
| Model 3-A | Favored region 64(98.5%)  Allowed region 1(1.5%)  Outlier region 0(0%) | 95.52 | -1.7 |
| Model 4-A | Favored region 64(98.5%)  Allowed region 0(0%)  Outlier region 0(0%) | 95.52 | -1.6 |
| Model 5-A | Favored region 53(100%)  Allowed region 0(0%)  Outlier region 0(0%) | 100 | -1.83 |
| Model 1-B / pepA | Favored region 64(98.5%)  Allowed region 1(1.5%)  Outlier region 0(0%) | 98.46 | -1.34 |
| Model2-B | Favored region 64(98.5%)  Allowed region 0(0%)  Outlier region 0(0%) | 100 | -1.55 |
| Model3-B | Favored region 65(100%)  Allowed region 0(0%)  Outlier region 0(0%) | 91.04 | -1.98 |
| Model4-B | Favored region 63(96.9%)  Allowed region 2(3.1%)  Outlier region 0(0%) | 95.52 | -1.72 |
| Model5-B | Favored region 64(98.5%)  Allowed region 1(1.5%)  Outlier region 0(0%) | 100 | -1.42 |
| Model 1-C | Favored region 64(98.5%)  Allowed region 1(1.5%)  Outlier region 0(0%) | 100 | -1.56 |
| Model 2-C | Favored region 64(98.5%)  Allowed region 1(1.5%)  Outlier region 0(0%) | 95.52 | -1.42 |
| Model 3-C | Favored region 64(98.5%)  Allowed region 1(1.5%)  Outlier region 0(0%) | 96.96 | -2.52 |
| Model 4-C | Favored region 63(96.9%)  Allowed region 1(1.5%)  Outlier region 0(0%) | 100 | -1.67 |
| Model 5-C | Favored region 62(95.4%)  Allowed region 1(1.5%)  Outlier region 1(1.5%) | 95.52 | -2.1 |
| Model 1-D | Favored region 64(98.5%)  Allowed region 1(1.5%)  Outlier region 0(0%) | 100 | -1.75 |
| Model 2-D | Favored region 63(96.9%)  Allowed region 1(1.5%)  Outlier region 0(0%) | 100 | -1.67 |
| Model 3-D | Favored region 63(96.9%)  Allowed region 2(3.1%)  Outlier region 0(0%) | 91.04 | -2.04 |
| Model 4-D | Favored region 64(98.5%)  Allowed region 0(0%)  Outlier region 0(0%) | 97.01 | -1.68 |
| Model 5-D | Favored region 64(98.5%)  Allowed region 0(0%)  Outlier region 0(0%) | 94.02 | -1.63 |

| **Structural Evaluation of Robetta Models** |  |  |  |
| --- | --- | --- | --- |
| Model/Server | **Ramachandran plot** | **ERRAT score** | **Z-score** |
| Model 1-A/ pep B | Favored region 64(98.5%)  Allowed region 1(1.5%)  Outlier region 0(0%) | 100 | -1.56 |
| Model2-A | Favored region 62(95.4%)  Allowed region 2(3.1%)  Outlier region 1(1.5%) | 94 | -1.47 |
| Model3-A | Favored region 62(95.4%)  Allowed region 2(3.1%)  Outlier region 1(1.5%) | 94 | -1.76 |
| Model 4-A | Favored region 62(95.4%)  Allowed region 2(3.1%)  Outlier region 1(1.5%) | 95 | -1.5 |
| Model5-A | Favored region 61(93.8%)  Allowed region 3(4.6%)  Outlier region 1(1.5%) | 96 | -1.78 |
| Model1-B | Favored region 65(100%)  Allowed region 0(0%)  Outlier region 0(0%) | 98 | -1.71 |
| Model2-B | Favored region 65(100%)  Allowed region 0(0%)  Outlier region 0(0%) | 98 | -1.83 |
| Model3-B | Favored region 64(98.5%)  Allowed region 1(1.5%)  Outlier region 0(0%) | 98 | -1.74 |
| Model4-B | Favored region 64(98.5%)  Allowed region 0(0%)  Outlier region 1(1.5%) | 97 | -2.05 |
| Model5-B | Favored region 65(100%)  Allowed region 0(0%)  Outlier region 0(0%) | 98 | -1.78 |
| Model1-C | Favored region 63(96.9%)  Allowed region 1(1.5%)  Outlier region 0(0%) | 97 | -2.23 |
| Model2-C | Favored region 63(96.9%)  Allowed region 1(1.5%)  Outlier region 0(0%) | 97 | -2.42 |
| Model3-C | Favored region 63(96.9%)  Allowed region 1(1.5%)  Outlier region 0(0%) | 97 | -1.9 |
| Model4-C | Favored region 63(96.9%)  Allowed region 1(1.5%)  Outlier region 0(0%) | 97 | -1.9 |
| Model5-C | Favored region 63(96.9%)  Allowed region 1(1.5%)  Outlier region 0(0%) | 95 | -1.9 |
| Model 1-D | Favored region 64(98.5%)  Allowed region 0(0%)  Outlier region 1(1.5%) | 98 | -1.97 |
| Model 2-D | Favored region 65(100%)  Allowed region 0(0%)  Outlier region 0(0%) | 95 | -1.89 |
| Model3-D | Favored region 64(98.5%)  Allowed region 1(1.5%)  Outlier region 0(0%) | 96 | -1.88 |
| Model 4-D | Favored region 64(98.5%)  Allowed region 0(0%)  Outlier region 0(0%) | 95 | -1.9 |
| Model5-D | Favored region 63(96.9%)  Allowed region 2(3.1%)  Outlier region 0(0%) | 93 | -1.65 |

**1.CUPSAT result of Surface/Accessible Residue:**

| 2LA2/A | Protein /chain |
| --- | --- |
| LYS | Wild type AA |
| 3 | Residue ID |
| helix | SS element |
| 89.45% | solvent accessibility |
| -53.9°, -67.1° | Position angles |

| Amino acid | Overall Stability | Torsion* | Predicted ΔΔG (kcal/mol) |
| --- | --- | --- | --- |
| LEU | Stabilising | Favourable | 0.14 |
| GLN | Stabilising | Favourable | 0.04 |

| 2LA2/A | Protein /chain |
| --- | --- |
| LYS | Wild type AA |
| 10 | Residue ID |
| helix | SS element |
| 63.2% | solvent accessibility |
| -65.4°, -58.7° | Position angles |

| Amino acid | Overall Stability | Torsion* | Predicted ΔΔG (kcal/mol) |
| --- | --- | --- | --- |
| VAL | Stabilising | Favourable | 0.43 |
| LEU | Stabilising | Favourable | 0.02 |
| ILE | Stabilising | Favourable | 0.7 |

**2. CUPSAT result of Flexible Regions**:

| 2LA2/A | Protein /chain |
| --- | --- |
| GLY | Wild type AA |
| 12 | Residue ID |
| helix | SS element |
| 52.1% | solvent accessibility |
| -58.2°, -48.3° | Position angles |

| Amino acid | Overall Stability | Torsion* | Predicted ΔΔG (kcal/mol) |
| --- | --- | --- | --- |
| ALA | Stabilising | Favourable | 2.5 |
| VAL | Stabilising | Favourable | 2.27 |
| LEU | Stabilising | Favourable | 2.18 |
| ILE | Stabilising | Favourable | 1.95 |
| MET | Stabilising | Favourable | 2.01 |
| TRP | Stabilising | Favourable | 0.97 |
| PHE | Stabilising | Favourable | 1.81 |
| GLN | Stabilising | Favourable | 1.87 |
| LYS | Stabilising | Favourable | 1.86 |
| TYR | Stabilising | Favourable | 2.03 |
| GLU | Stabilising | Favourable | 2.41 |
| ARG | Stabilising | Favourable | 2.05 |

| 2LA2/A | Protein /chain |
| --- | --- |
| GIY | Wild type AA |
| 18 | Residue ID |
| helix | SS element |
| 39.39% | solvent accessibility |
| -66.2°, -42.4° | Position angles |

| Amino acid | Overall Stability | Torsion* | Predicted ΔΔG (kcal/mol) |
| --- | --- | --- | --- |
| ALA | Stabilising | Favourable | 1.79 |
| VAL | Stabilising | Favourable | 0.11 |
| LEU | Stabilising | Favourable | 0.43 |
| ILE | Stabilising | Favourable | 0.57 |
| MET | Stabilising | Favourable | 0.43 |
| LYS | Stabilising | Favourable | 1.3 |
| GLU | Stabilising | Favourable | 0.83 |
| ARG | Stabilising | Favourable | 0.8 |

1. **CUPSAT result of Non-critical Residues**:

| 2LA2/A | Protein /chain |
| --- | --- |
| ALA | Wild type AA |
| 22 | Residue ID |
| Other(turn.coils,etc…) | SS element |
| 81.67% | solvent accessibility |
| -97.4°, -67.8° | Position angles |

| Amino acid | Overall Stability | Torsion* | Predicted ΔΔG (kcal/mol) |
| --- | --- | --- | --- |
| VAL | Stabilising | Favourable | 1.51 |
| ILE | Stabilising | Favourable | 1.27 |
| TRP | Stabilising | Favourable | 1.89 |
| PHE | Stabilising | Favourable | 0.78 |
| LYS | Stabilising | Favourable | 0.97 |
| ASP | Stabilising | Favourable | 1.03 |
| HIS | Stabilising | Favourable | 0.87 |

| 2LA2/A | Protein /chain |
| --- | --- |
| ALA | Wild type AA |
| 25 | Residue ID |
| Other (turn.coils,etc…) | SS element |
| 62.61% | solvent accessibility |
| -99.6°,- 37.4° | Position angles |

| Amino acid | Overall Stability | Torsion* | Predicted ΔΔG (kcal/mol) |
| --- | --- | --- | --- |
| VAL | Stabilising | Favourable | 0.15 |
| LEU | Stabilising | Favourable | 0.44 |
| ILE | Stabilising | Favourable | 0.1 |
| MET | Stabilising | Favourable | 0.37 |
| THR | Stabilising | Favourable | 0.5 |
| GLN | Stabilising | Favourable | 0.44 |
| LYS | Stabilising | Favourable | 0.72 |
| TYR | Stabilising | Favourable | 0.51 |
| GLU | Stabilising | Favourable | 0.52 |
| ASP | Stabilising | Favourable | 0.82 |
| ARG | Stabilising | Favourable | 0.5 |
| HIS | Stabilising | Favourable | 0.52 |
